# Supplementary material for: Energetical analysis of a method for the scale-up of a microwave flow P-esterification by recirculation
Source: Royal Society of Chemistry journal article supplement (doi:10.1039/d4re00622d), 2025-01-01
Supplement: d4re00622d1.pdf [file d4re00622d1.pdf]

## ARTICLE

### Supplementary Material

## The energetical analysis of a method for the scale-up of a microwave flow P-esterification by recirculation

József Schindler<sup>a\*</sup>, István Greiner<sup>b</sup> and György Keglevich<sup>a</sup>

<sup>a</sup> Department of Organic Chemistry and Technology, Faculty of Chemical Technology and Biotechnology, Budapest University of Technology and Economics, 1111 Budapest, Műegyetem rkp. 3, Hungary. E-mail:

\* [schindler.jozsef@vbk.bme.hu](mailto:schindler.jozsef@vbk.bme.hu)<sup>†</sup>

<sup>b</sup> Gedeon Richter Plc,

### General Information.

The MW reactions were carried out in a CEM Discover (300 W) focused microwave reactor (CEM Microwave Technology Ltd., Buckingham, U.K.) equipped with a 10 mL flow cell available from the supplier of CEM using 40–200 W irradiation under isothermal conditions. The reaction temperature was monitored by an external IR sensor. LC–MS measurements were performed with an Agilent 1200 liquid chromatography system, coupled with a 6130 quadrupole mass spectrometer equipped with an ESI ion source (Agilent Technologies, Palo Alto, CA, USA).

### Preparation of the reaction mixture

A mixture of 10 g (70.4 mmol) Ph<sub>2</sub>P(O)H(OH) and 100 mL (1.1 mol) of butyl alcohol was homogenized by stirring at 25°C for 15 min. For the catalyzed versions, 1.0 g (3.5 mmol) of [bmim][PF<sub>6</sub>] was also added to another mixture prepared as above.

### General procedure for the circulated flow esterification of phenyl-H-phosphinic acid (1) with butyl alcohol

A 25, 50 or 100 mL mixture containing PhP(O)H(OH) (1) and nBuOH in a ratio of 1: 15.6, in the catalyzed versions also 5% of [bmim][PF<sub>6</sub>] was circulated applying the corresponding rate at 25°C and under 17 bar. After the mixture filled the system, the flow cell was irradiated with a power of 300 W until the desired temperature was reached. After this, the power was controlled automatically (by 40–200 W) to maintain the value set. The operation was regarded steady state after 17–175 min reaching the “plato” as suggested by LC–MS analysis.

A part of the measurements was repeated, and the data could be reproduced within a standard deviation ± 2%.

## ARTICLE

**Table S1** Direct esterification of phenyl-*H*-phosphinic acid (1) in a recirculated batch MW a reactor

| Entry | W<br>[mL/min] | T<br>[°C] | Cat. | V<br>[mL] | $t_{0.9X_f}$<br>[min] | 0.9 $X_f$<br>[%] | $n_{t_{0.9X_f}}$<br>[mmol] | $P_f$<br>[W] | Energy [Wh] |       |       |      | Molar energy [Wh/mmol] |          |          | Average power [W] |       |       | $\gamma$<br>[mmol/min] |
|-------|---------------|-----------|------|-----------|-----------------------|------------------|----------------------------|--------------|-------------|-------|-------|------|------------------------|----------|----------|-------------------|-------|-------|------------------------|
|       |               |           |      |           |                       |                  |                            |              | $E_t$       | $E_b$ | $E_r$ | EE   | $E_{mt}$               | $E_{mb}$ | $E_{mr}$ | $P_t$             | $P_b$ | $P_r$ |                        |
| 1     | 1             | 160       | -    | 25        | 77.0                  | 62.6             | 11.0                       | 42           | 62          | 54    | 8     | 0.14 | 5.6                    | 4.9      | 0.7      | 48                | 42    | 6     | 0.14                   |
| 2     | 1             | 160       | yes  | 25        | 31.0                  | 62.5             | 11.0                       | 24           | 22          | 12    | 9     | 0.76 | 2.0                    | 1.1      | 0.9      | 42                | 24    | 18    | 0.35                   |
| 3     | 1             | 140       | yes  | 25        | 41.7                  | 59.4             | 10.4                       | 19           | 27          | 13    | 14    | 1.04 | 2.6                    | 1.3      | 1.3      | 39                | 19    | 20    | 0.25                   |
| 4     | 3.5           | 160       | -    | 25        | 13.6                  | 68.3             | 12.0                       | 108          | 64          | 24    | 39    | 1.60 | 5.3                    | 2.0      | 3.3      | 281               | 108   | 173   | 0.88                   |
| 5     | 3.5           | 160       | yes  | 25        | 10.7                  | 68.6             | 12.1                       | 105          | 47          | 19    | 29    | 1.53 | 3.9                    | 1.6      | 2.4      | 265               | 105   | 160   | 1.13                   |
| 6     | 6.5           | 160       | -    | 25        | 14.3                  | 68.0             | 12.0                       | 148          | 71          | 35    | 36    | 1.01 | 5.9                    | 2.9      | 3.0      | 297               | 148   | 149   | 0.84                   |
| 7     | 6.5           | 160       | yes  | 25        | 10.7                  | 72.1             | 12.7                       | 145          | 53          | 26    | 27    | 1.04 | 4.2                    | 2.0      | 2.1      | 296               | 145   | 151   | 1.18                   |
| 8     | 10            | 160       | -    | 25        | 15.2                  | 72.1             | 12.7                       | 205          | 75          | 52    | 23    | 0.45 | 5.9                    | 4.1      | 1.9      | 298               | 205   | 93    | 0.83                   |
| 9     | 10            | 160       | yes  | 25        | 10.7                  | 72.3             | 13.4                       | 202          | 56          | 37    | 19    | 0.52 | 4.2                    | 2.7      | 1.5      | 296               | 202   | 94    | 1.17                   |
| 10    | 10            | 160       | -    | 50        | 23.5                  | 67.1             | 23.6                       | 185          | 115         | 72    | 43    | 0.59 | 4.9                    | 3.1      | 1.8      | 294               | 185   | 109   | 1.00                   |
| 11    | 10            | 160       | -    | 100       | 73.0                  | 63.5             | 44.7                       | 180          | 273         | 219   | 54    | 0.25 | 6.1                    | 4.9      | 1.2      | 224               | 180   | 44    | 0.61                   |
